# Supplementary material for: Inorganic–organic hybrid compounds based on octamolybdates and metal–organic fragments with flexible multidentate ligand: syntheses, structures and characterization
Source: Royal Society of Chemistry journal article supplement (doi:10.1039/c0dt01024c), 2010-12-02
Supplement: c0dt01024c.pdf [file c0dt01024c.pdf]

## Electronic supplementary information (ESI)

### **Inorganic–organic hybrid compounds based on octamolybdates and metal-organic fragments with flexible multidentate ligand: syntheses, structures and characterization**

Hai-Yan Liu,<sup>a,b</sup> Hua Wu,<sup>a</sup> Jian-Fang Ma,<sup>\* a</sup> Ying-Ying Liu,<sup>a</sup> Jin Yang,<sup>\* a</sup> and Ji-Cheng Ma<sup>a</sup>

<sup>a</sup>*Key Lab of Polyoxometalate Science, Department of Chemistry, Northeast Normal University, Changchun 130024, People's Republic of China*

<sup>b</sup>*Department of Chemistry and Pharmaceutical Engineering, Suihua University, Suihua 152061, People's Republic of China*

\* Correspondence authors

E-mail: jianfangma@yahoo.com.cn (J.-F. Ma)

E-mail: yangjinnenu@yahoo.com.cn (J. Yang)

Fax: +86-431-85098620 (J.-F. Ma)

**Table S1.** Selected bond lengths [Å] and angles [°] for **1-6**<sup>[a]</sup>

| Compound 1          |            |                      |            |
|---------------------|------------|----------------------|------------|
| Cu(1)-N(1)          | 1.945(6)   | Cu(1)-N(1)#3         | 1.945(6)   |
| Cu(1)-O(1W)         | 2.013(7)   | Cu(1)-O(1W)#3        | 2.013(7)   |
| Cu(2)-N(8)#4        | 1.986(6)   | Cu(2)-N(8)#5         | 1.986(6)   |
| Cu(2)-N(6)#6        | 1.988(6)   | Cu(2)-O(5)           | 2.675(6)   |
| Cu(2)-O(5)#6        | 2.675(6)   | Cu(2)-O(6)           | 1.988(6)   |
| N(1)#3-Cu(1)-N(1)   | 180        | N(1)#3-Cu(1)-O(1W)   | 87.7(3)    |
| N(1)-Cu(1)-O(1W)    | 92.3(3)    | N(1)#3-Cu(1)-O(1W)#3 | 92.3(3)    |
| N(1)-Cu(1)-O(1W)#3  | 87.7(3)    | O(1W)-Cu(1)-O(1W)#3  | 180        |
| N(8)#4-Cu(2)-N(8)#5 | 180        | N(8)#4-Cu(2)-N(6)    | 90.5(2)    |
| N(8)#5-Cu(2)-N(6)   | 89.5(2)    | N(8)#4-Cu(2)-N(6)#6  | 89.5(2)    |
| N(8)#5-Cu(2)-N(6)#6 | 90.5(2)    | N(6)-Cu(2)-N(6)#6    | 180        |
| O(5)-Cu(2)-O(5)#6   | 180        | N(6)-Cu(2)-O(5)      | 86.88(5)   |
| O(5)-Cu(2)-N(8)#5   | 98.99(5)   | O(5)-Cu(2)-N(8)#4    | 81.01(5)   |
| Compound 2          |            |                      |            |
| Cu(1)-N(6)#4        | 1.911(7)   | Cu(1)-O(1)           | 2.344(5)   |
| Cu(1)-O(10)         | 2.359(6)   | Cu(1)-N(1)           | 1.918(6)   |
| Cu(2)-O(1W)         | 1.7623(13) | Cu(2)-N(2)           | 1.935(7)   |
| Cu(2)-N(9)#5        | 1.914(6)   |                      |            |
| N(6)#4-Cu(1)-N(1)   | 165.7(3)   | N(6)#4-Cu(1)-O(1)    | 103.2(2)   |
| N(1)-Cu(1)-O(1)     | 88.9(2)    | N(6)#4-Cu(1)-O(10)   | 88.8(3)    |
| N(1)-Cu(1)-O(10)    | 100.4(2)   | O(1)-Cu(1)-O(10)     | 82.87(19)  |
| O(1W)-Cu(2)-N(9)#5  | 69.1(2)    | O(1W)-Cu(2)-N(2)     | 112.8(2)   |
| N(9)#5-Cu(2)-N(2)   | 169.4(3)   |                      |            |
| Compound 3          |            |                      |            |
| Cu(1)-N(9)          | 1.878(10)  | Cu(1)-N(3)#2         | 1.92(2)    |
| Cu(2)-N(6)          | 1.893(8)   | Cu(2)-N(12)          | 1.872(9)   |
| Cu(3)-N(15)         | 1.882(8)   | Cu(3)-N(21)          | 1.880(8)   |
| Cu(3)-O(1)          | 2.527(8)   | Cu(4)-N(18)          | 1.872(8)   |
| Cu(4)-N(24)#3       | 1.900(8)   |                      |            |
| N(9)-Cu(1)-N(3)#2   | 174.9(9)   | N(12)-Cu(2)-N(6)     | 176.8(4)   |
| N(21)-Cu(3)-N(15)   | 173.1(4)   | N(18)-Cu(4)-N(24)#3  | 165.1(4)   |
| O(1)-Cu(3)-N(21)    | 90.71(4)   | O(1)-Cu(3)-N(15)     | 94.31(4)   |
| Compound 4          |            |                      |            |
| Ni(1)-N(9)#4        | 2.067(4)   | Ni(1)-N(6)#1         | 2.075(5)   |
| Ni(1)-N(1)          | 2.074(5)   | Ni(1)-O(2W)          | 2.071(4)   |
| Ni(1)-O(3W)         | 2.086(4)   | Ni(1)-O(1W)          | 2.099(4)   |
| N(1)-Ni(1)-N(9)#4   | 92.77(18)  | N(1)-Ni(1)-N(6)#1    | 174.12(18) |
| N(9)#4-Ni(1)-N(6)#1 | 93.01(18)  | N(1)-Ni(1)-O(2W)     | 91.00(18)  |
| N(9)#4-Ni(1)-O(2W)  | 92.54(15)  | N(6)#1-Ni(1)-O(2W)   | 87.68(16)  |
| N(1)-Ni(1)-O(3W)    | 88.69(19)  | N(9)#4-Ni(1)-O(3W)   | 177.70(19) |

|                      |            |                    |            |
|----------------------|------------|--------------------|------------|
| N(6)#1-Ni(1)-O(3W)   | 85.50(18)  | O(2W)-Ni(1)-O(3W)  | 85.66(16)  |
| N(1)-Ni(1)-O(1W)     | 89.75(19)  | N(9)#4-Ni(1)-O(1W) | 90.44(16)  |
| N(6)#1-Ni(1)-O(1W)   | 91.27(17)  | O(2W)-Ni(1)-O(1W)  | 176.89(16) |
| O(3W)-Ni(1)-O(1W)    | 91.34(17)  |                    |            |
| Compound 5           |            |                    |            |
| Zn(1)-N(8)#4         | 1.968(3)   | N(1)-Zn(1)         | 1.958(3)   |
| Zn(1)-O(1W)          | 2.050(4)   | Zn(1)-N(6)#1       | 2.091(4)   |
| Zn(1)-O(5)           | 2.773(4)   |                    |            |
| N(1)-Zn(1)-N(8)#4    | 146.10(15) | N(1)-Zn(1)-O(1W)   | 109.90(15) |
| N(8)#4-Zn(1)-O(1W)   | 95.88(14)  | N(1)-Zn(1)-N(6)#1  | 97.94(13)  |
| N(8)#4-Zn(1)-N(6)#1  | 103.66(14) | O(1W)-Zn(1)-N(6)#1 | 90.45(15)  |
| O(5)-Zn(1)-N(1)      | 78.29(2)   | O(5)-Zn(1)-O(1W)   | 75.27(2)   |
| O(5)-Zn(1)-N(6)#1    | 162.68(2)  | O(5)-Zn(1)-N(8)#4  | 87.78(2)   |
| Compound 6           |            |                    |            |
| Ag(1)-N(9)#2         | 2.107(9)   | Ag(1)-N(3)         | 2.137(9)   |
| Ag(1)-O(10)#2        | 2.671(9)   | Ag(2)-N(6)#1       | 2.184(9)   |
| Ag(2)-O(3)           | 2.670(9)   | Ag(2)-N(2)         | 2.270(8)   |
| Ag(2)-N(8)           | 2.577(10)  |                    |            |
| N(9)#2-Ag(1)-N(3)    | 171.9(4)   | N(6)#1-Ag(2)-N(2)  | 155.9(4)   |
| N(6)#1-Ag(2)-N(8)    | 90.0(4)    | N(2)-Ag(2)-N(8)    | 109.4(4)   |
| N(9)#2-Ag(1)-O(10)#2 | 91.51(4)   | N(3)-Ag(1)-O(10)#2 | 92.70(4)   |
| N(8)-Ag(2)-O(3)      | 85.98(4)   | N(6)#1-Ag(2)-O(3)  | 79.55(4)   |
| N(2)-Ag(2)-O(3)      | 87.57(4)   |                    |            |

Symmetry codes For **1**: #3 -x-2,-y+1,-z-1; #4 -x,-y+1,-z; #5 x,y-1,z; #6 -x,-y,-z; For **2**: #4 x+1,y-1,z; #5 x,y,z+1. For **3**: #2 x-1,y,z; #3 x,y,z-1. For **4**: #1 -x+1,-y,-z+2; #4 x+1/2,-y+1/2,z-1/2. For **5**: #1 -x+2,-y,-z+1; #4 x-1/2,-y+1/2,z+1/2. For **6**: #1 -x+1,-y,-z; #2 -x,-y,-z+1.

**Table S2.** Hydrogen-bond geometries for compound **4**(Å, °)

| D-H...A               | D-H     | H...A   | D...A    | <D-H...A  |
|-----------------------|---------|---------|----------|-----------|
|                       | [Å]     | [Å]     | [Å]      | [°]       |
| O(3W)-H(5A)...O(13)#1 | 0.85(6) | 1.90(7) | 2.676(6) | 150(6)    |
| O(2W)-H(2B)...O(7)    | 0.85(3) | 1.93(2) | 2.759(5) | 167.5(18) |
| O(1W)-H(1A)...O(4W)   | 0.85(5) | 2.14(6) | 2.681(9) | 121(6)    |

Symmetry codes for **4**: #1 -x+1,-y,-z+2.

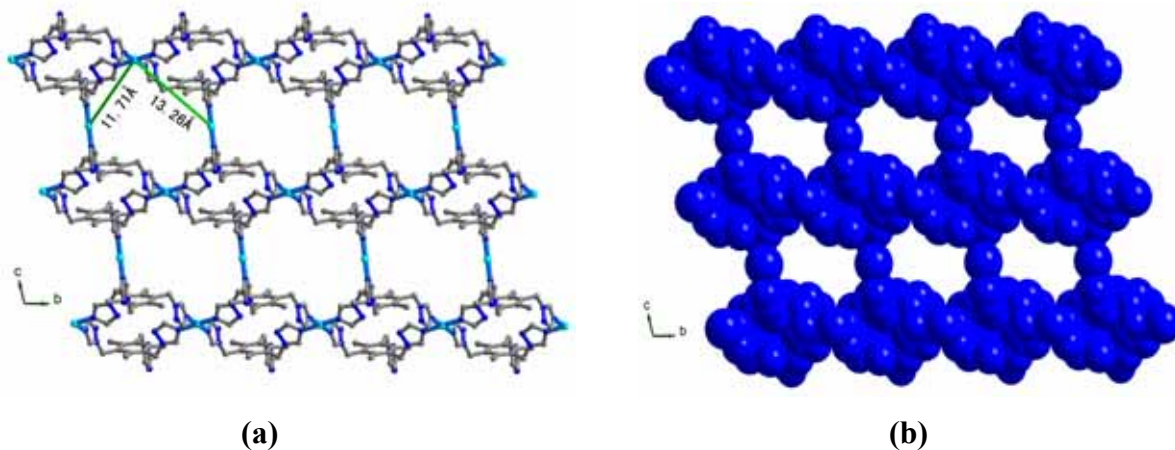

**Fig. S1** (a) View of the 2D sheet in **1**. (b) 1D tubular channels along the a-axis of **1**

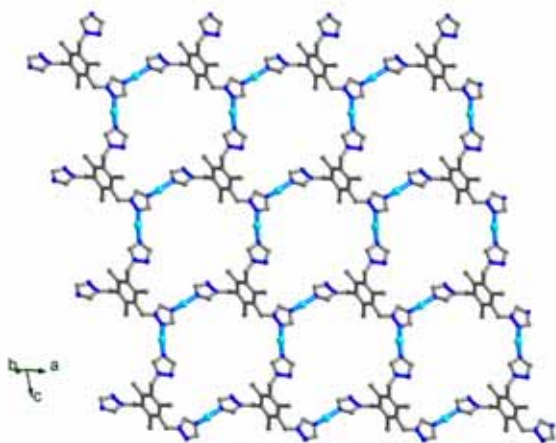

**Fig. S2** View of the 2D single sheet in **2**.

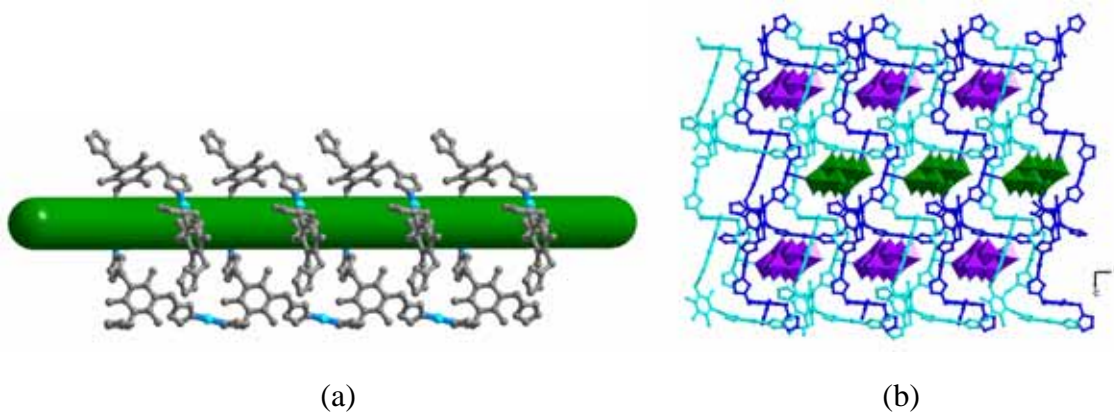

**Fig. S3** (a) View of a 1D tubular chain in **3**. (b) Perspective view of the 2-fold interpenetrating net of **2**.

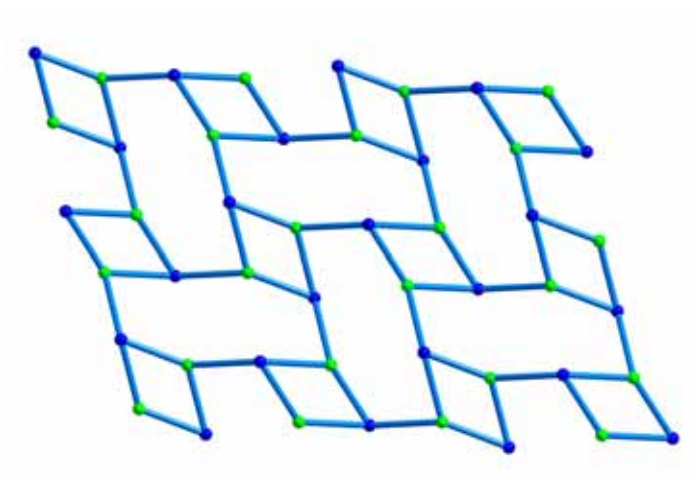

Fig. S4 Schematic view of the  $(4^1 \cdot 8^2)_2$  topology of **4**

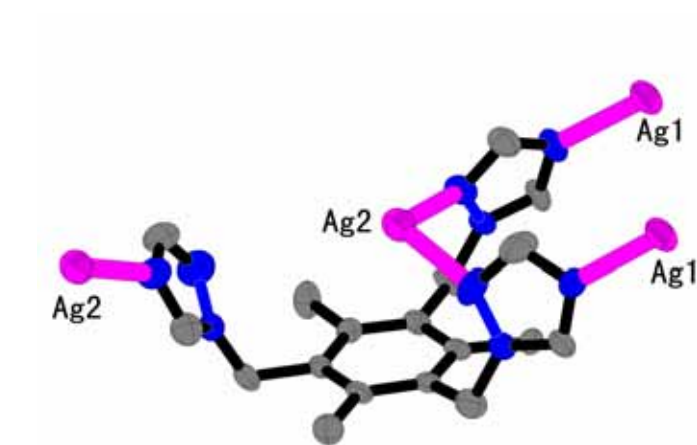

Fig. S5 Coordination fashion of the ttb ligand in **6**.

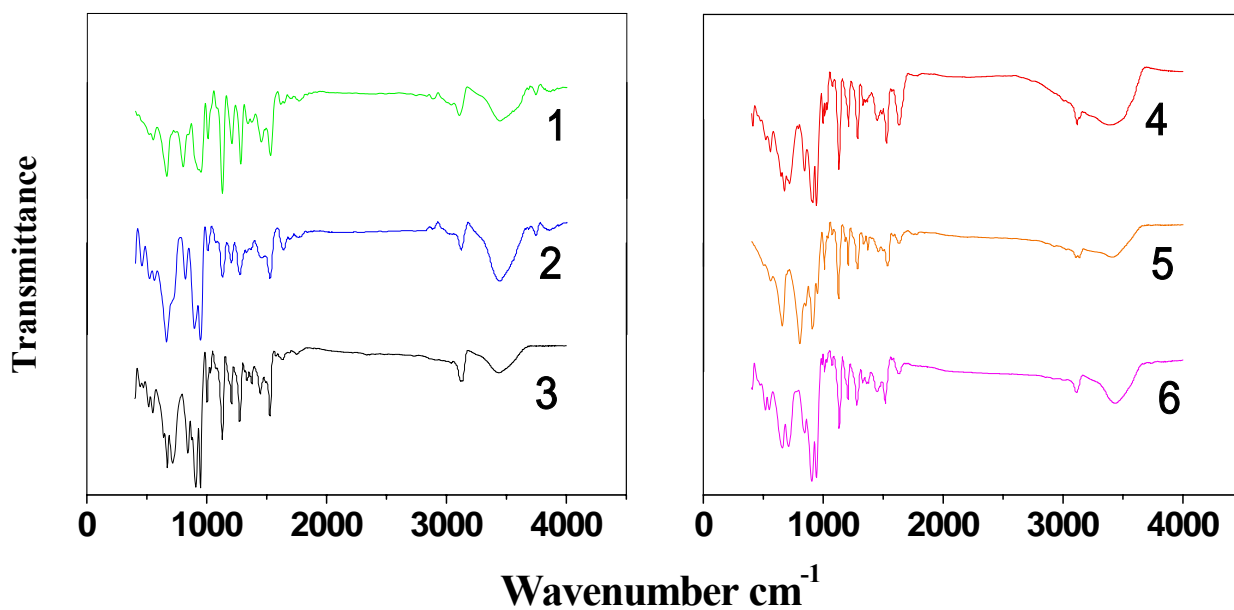

Fig. S6 The IR spectra of compounds 1–6

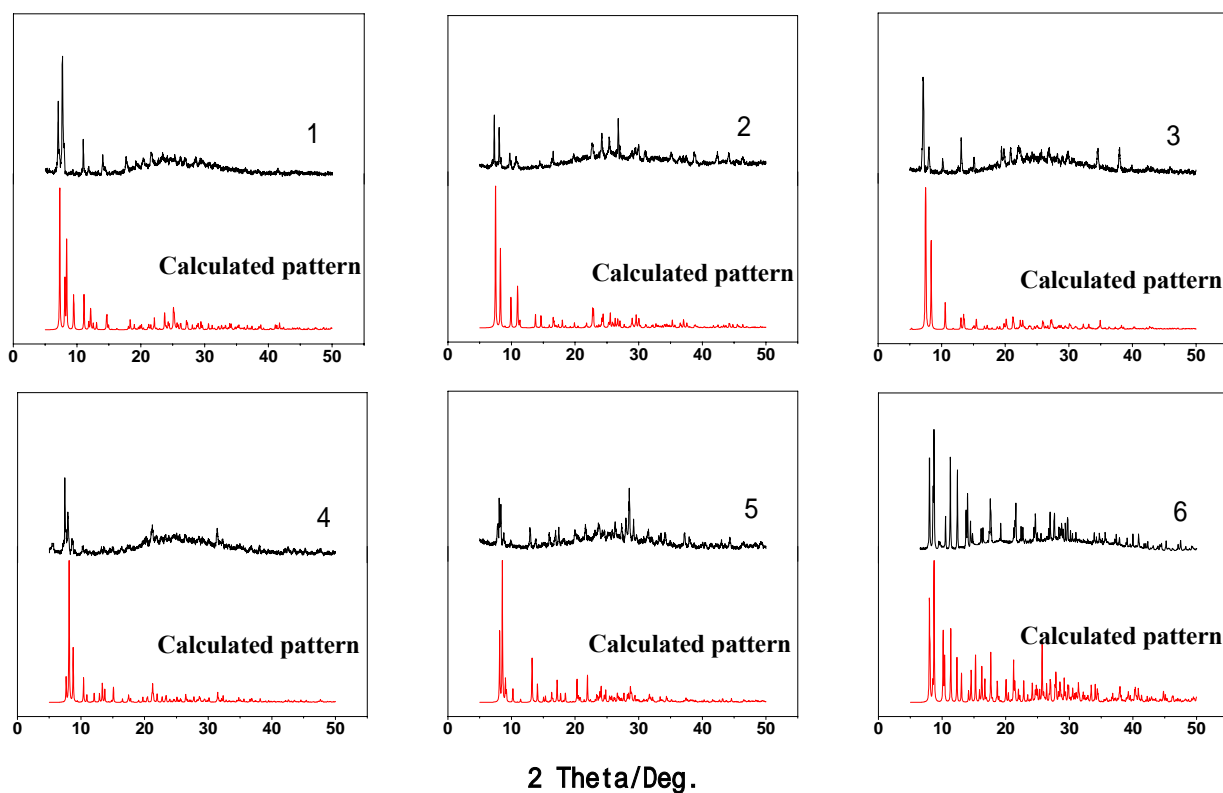

Fig. S7 The calculated and experimental PXRD patterns of compounds 1–6.

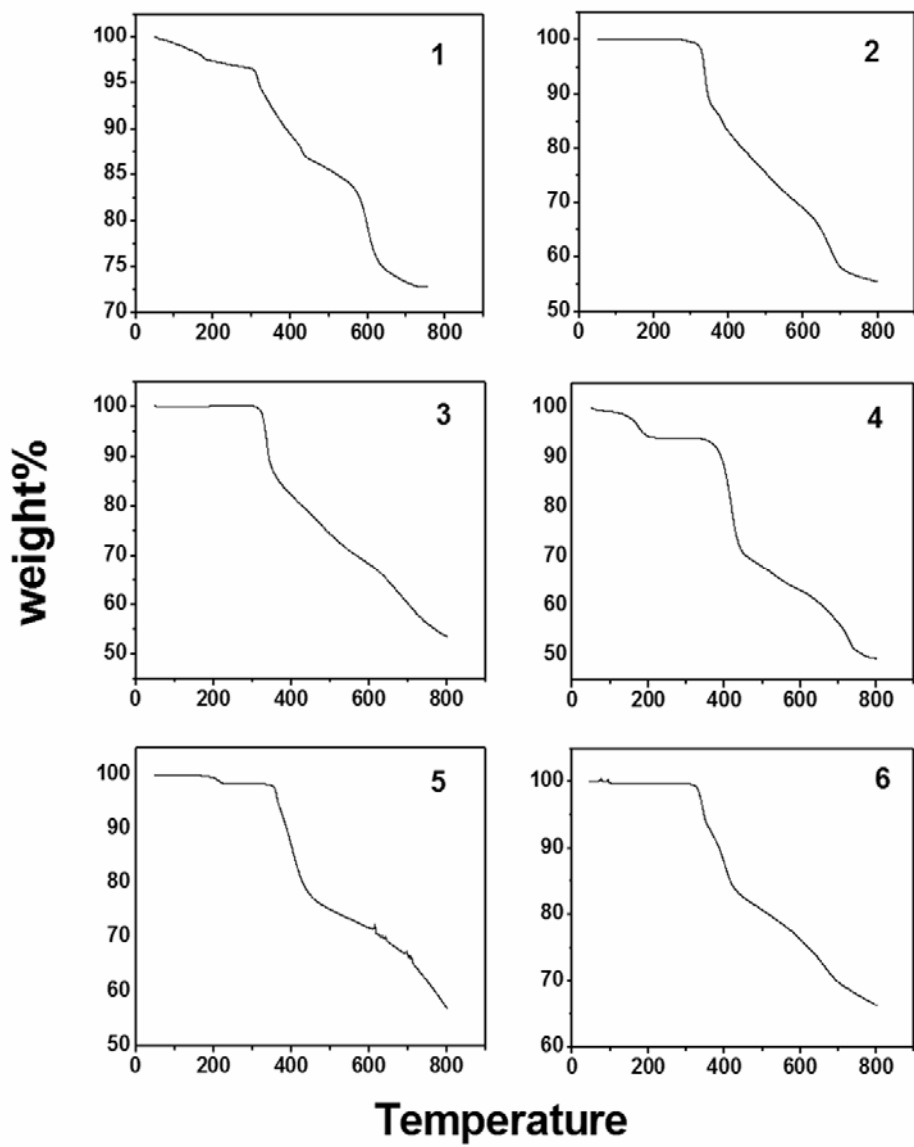

Fig. S8 TGA spectra for 1-6

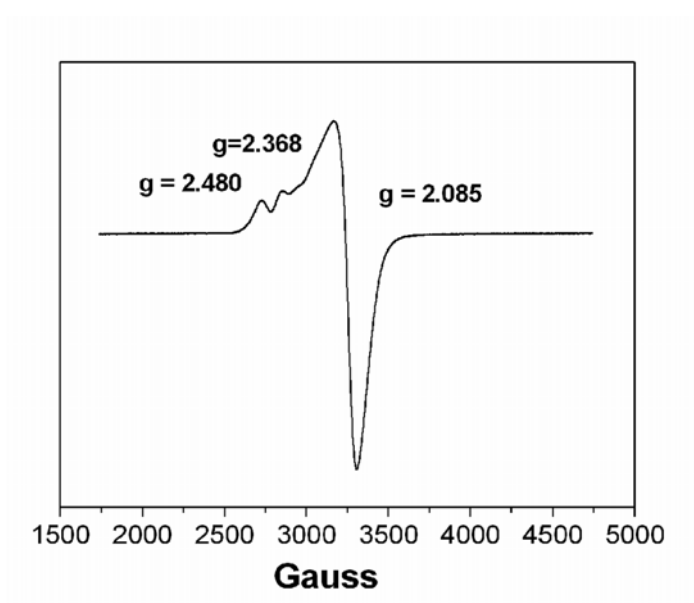

**Fig. S9.** EPR spectrum of **1**
